# Supplementary material
Source: PubMed Central journal article supplement (PMC2744600)

# Supplementary Figure 1

**A**

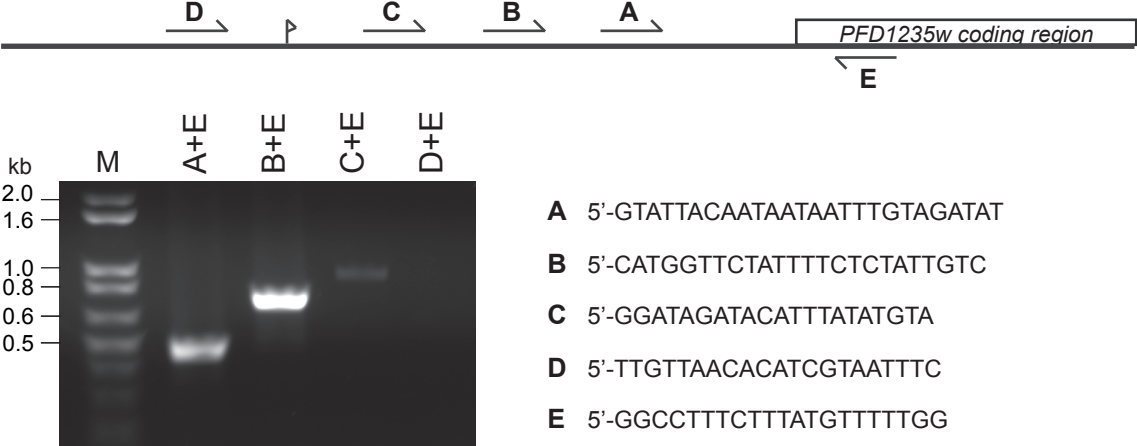

**B**

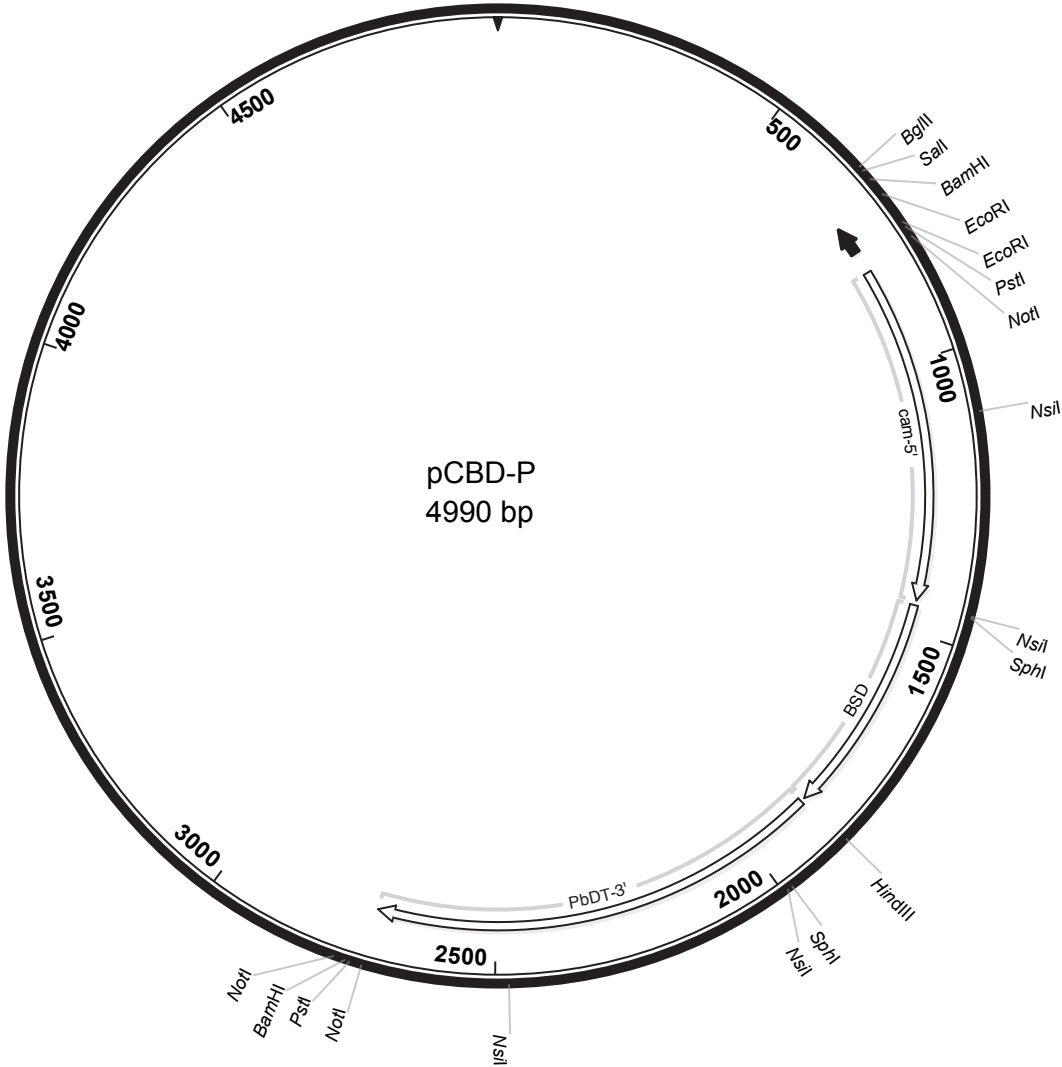

# Supplementary Figure 2A

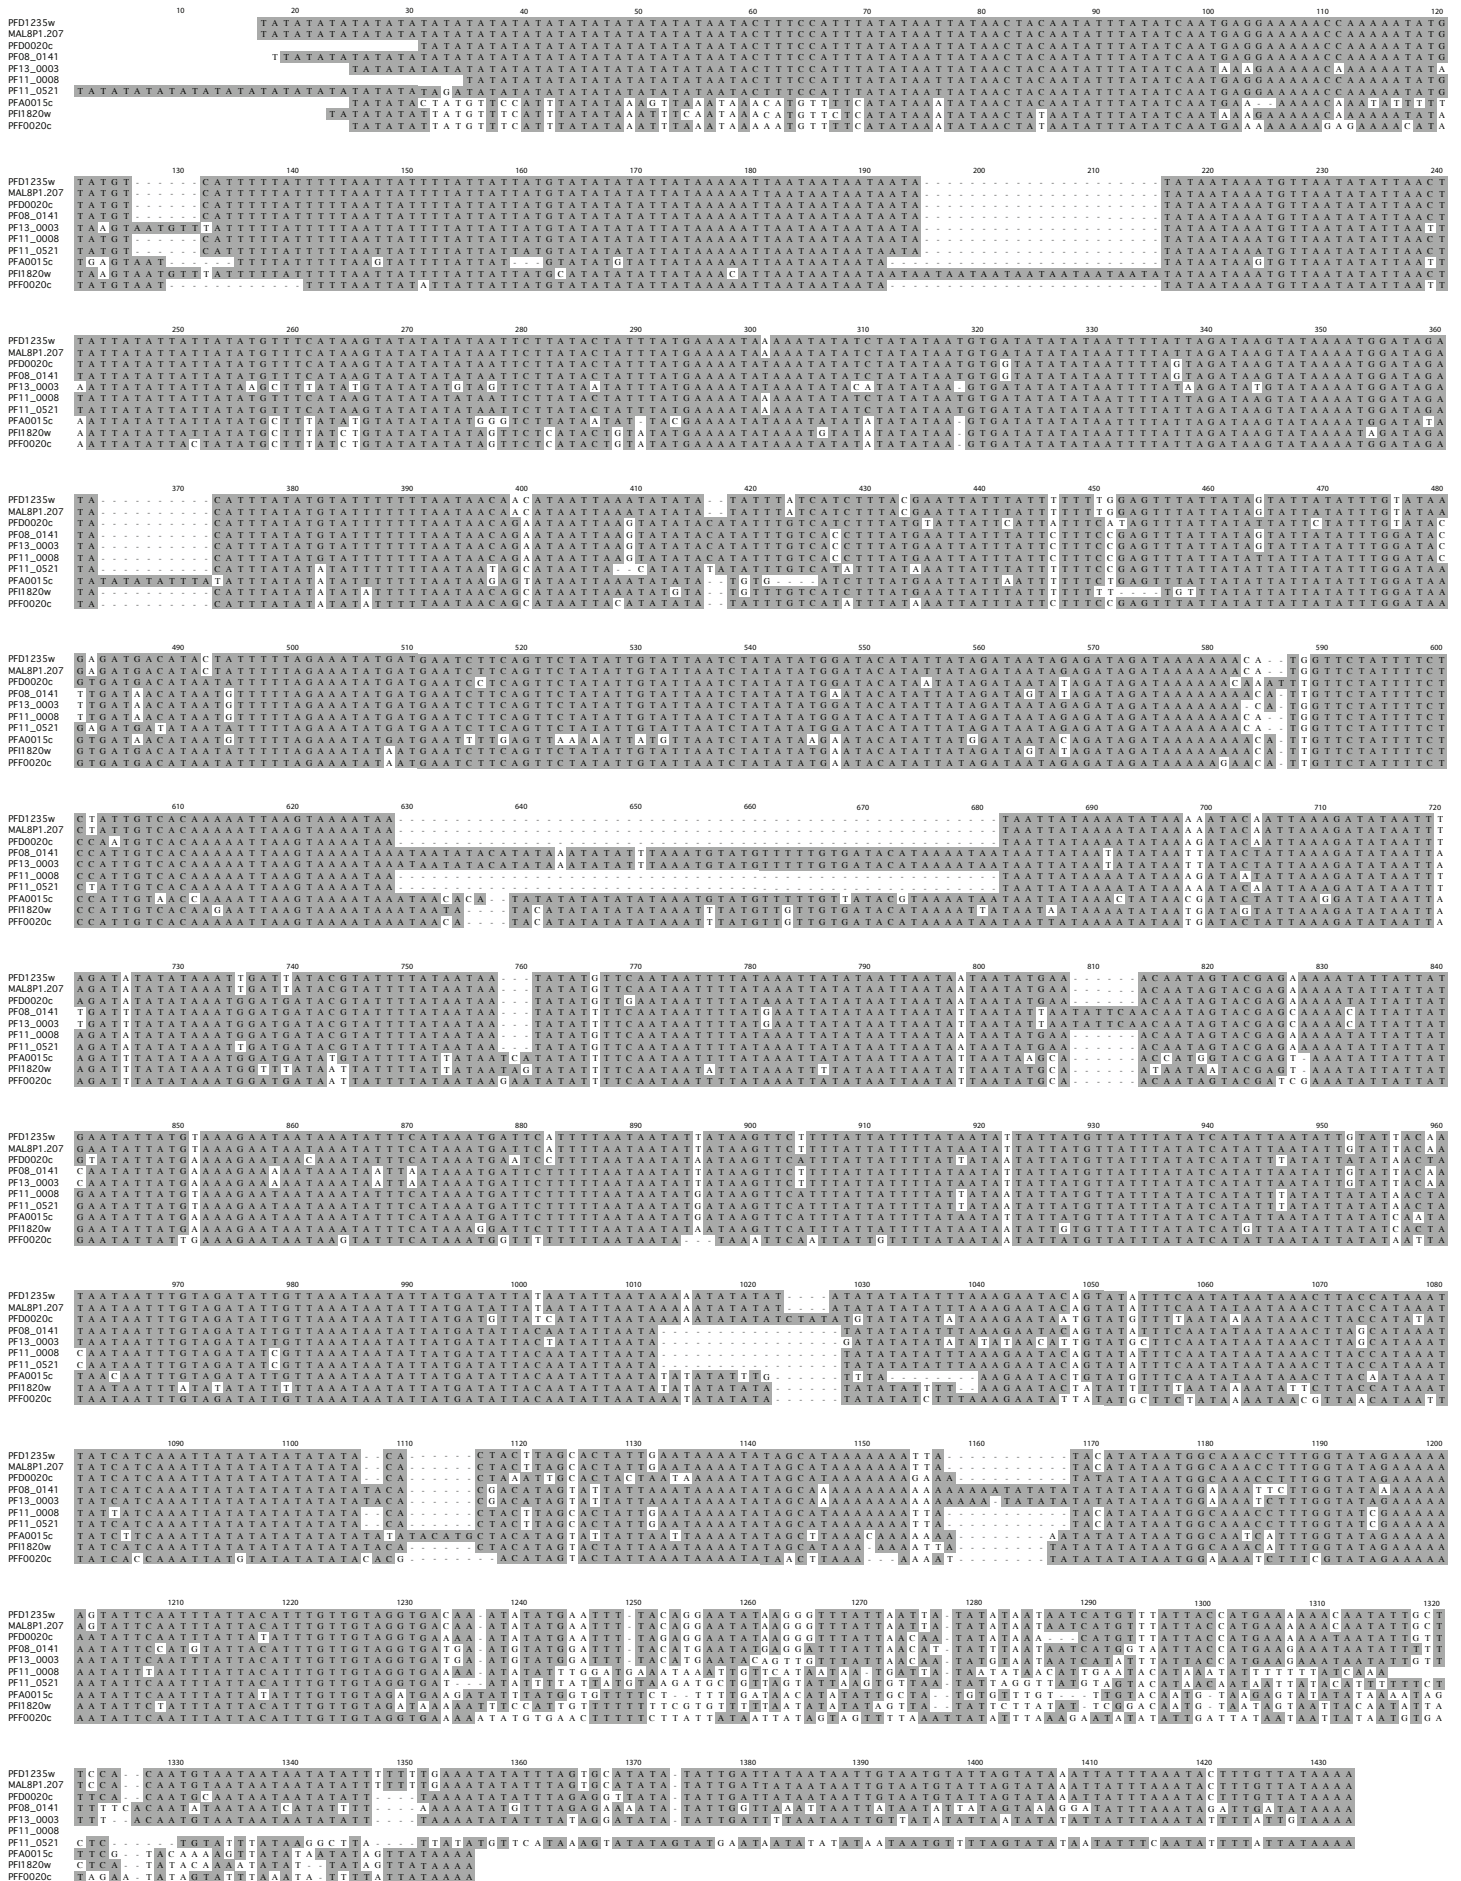

# Supplementary Figure 2B

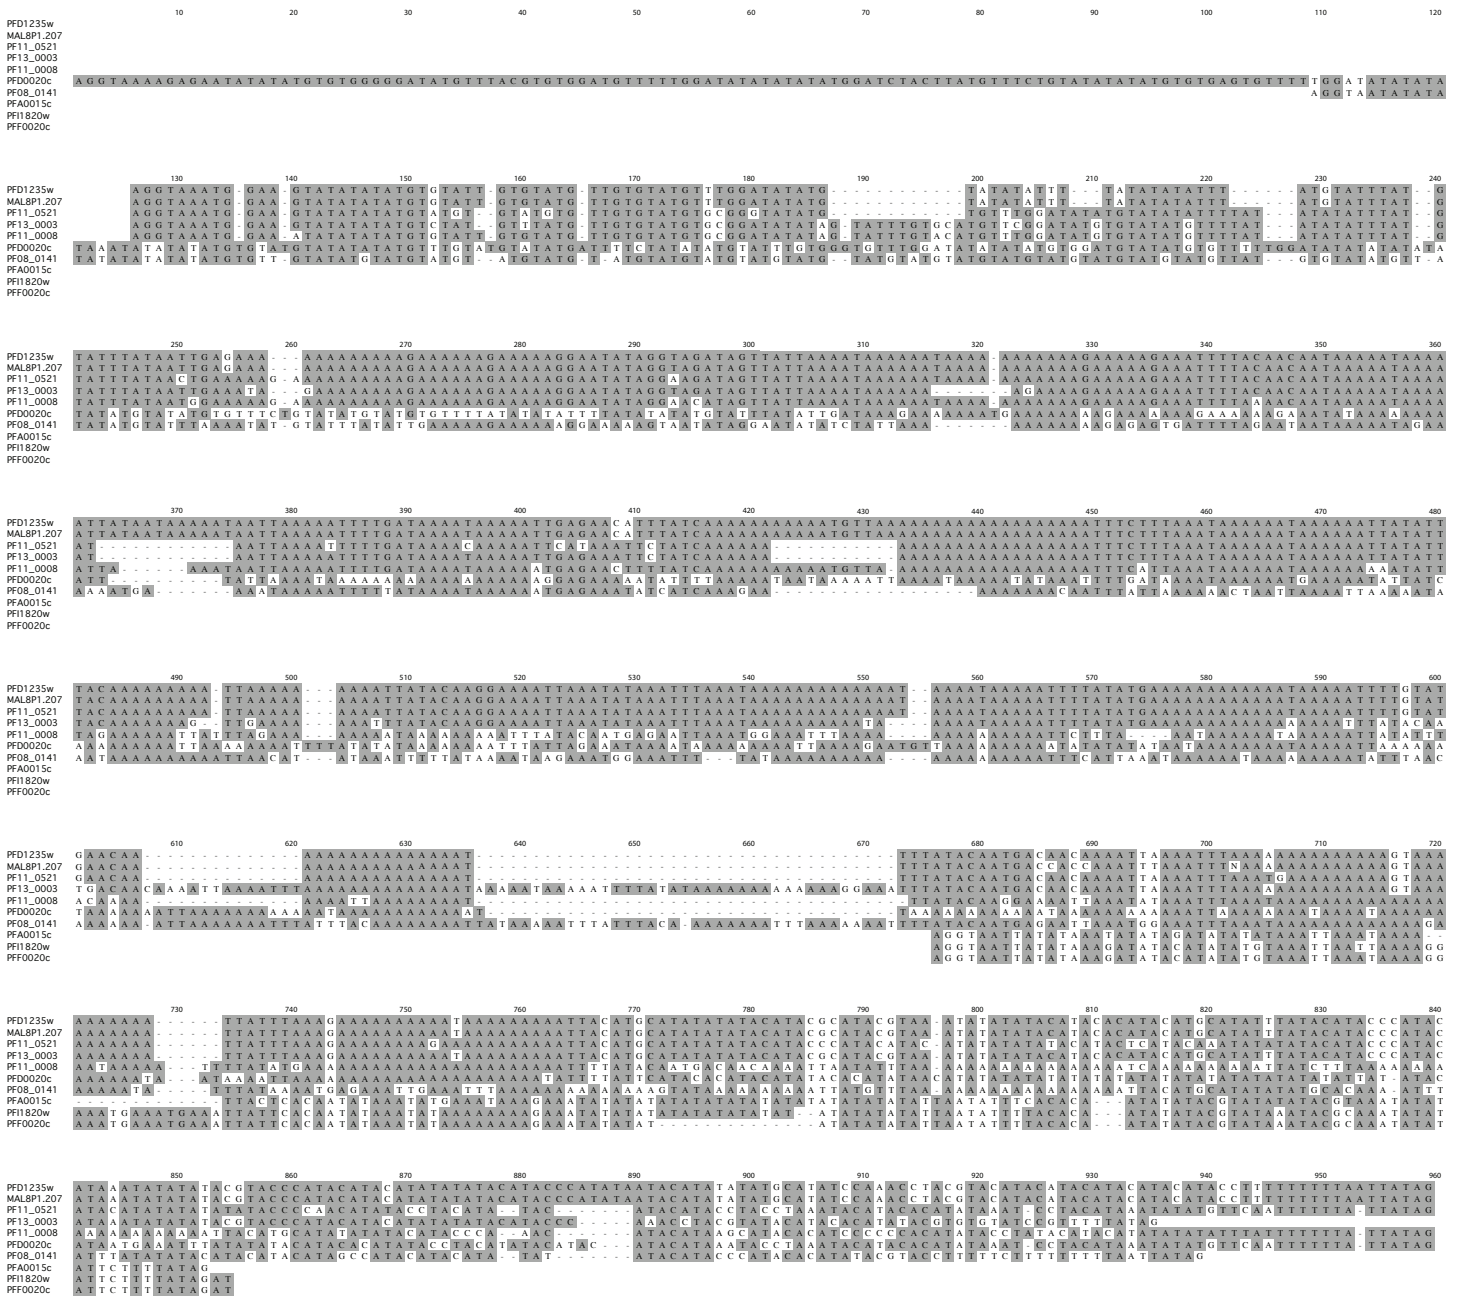

# Supplementary Figure 2C

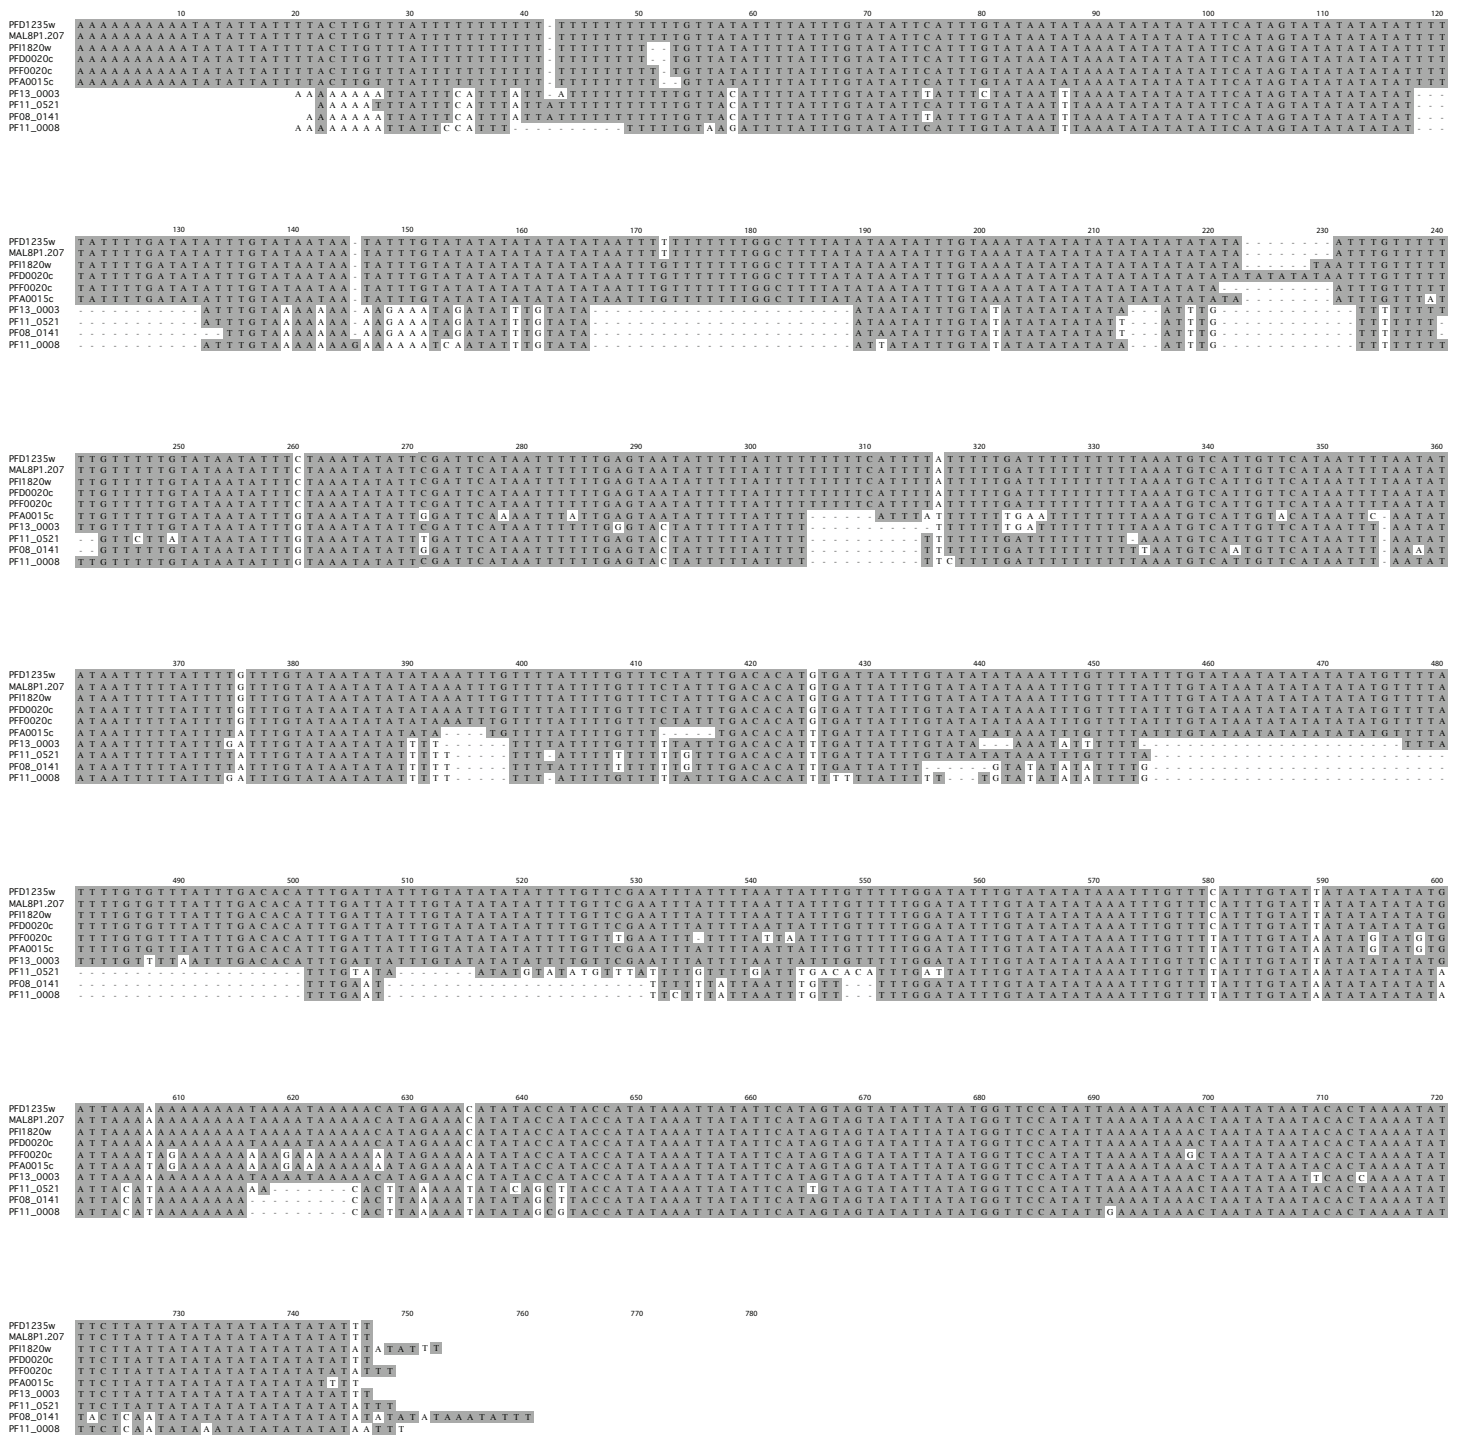

Supplementary Figure 2D

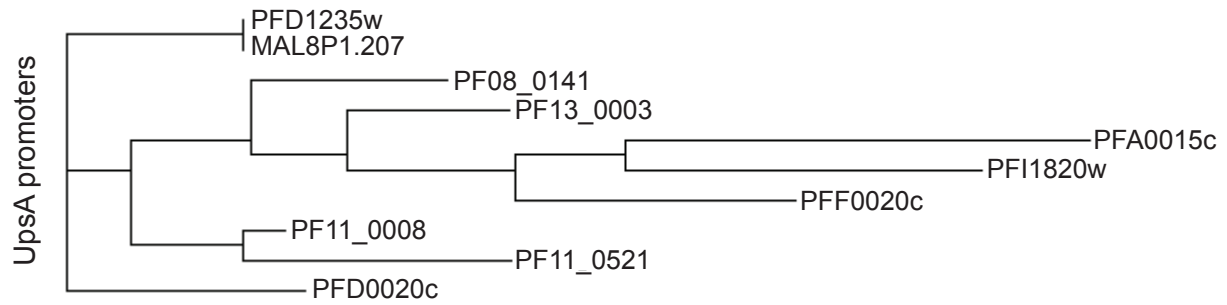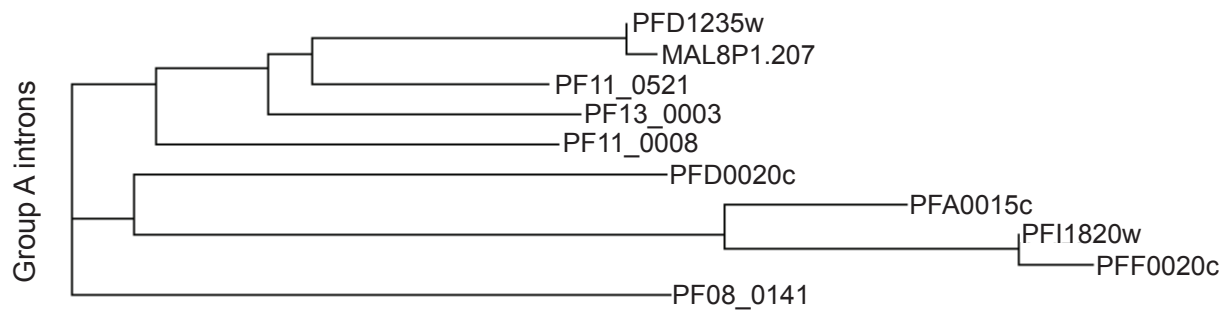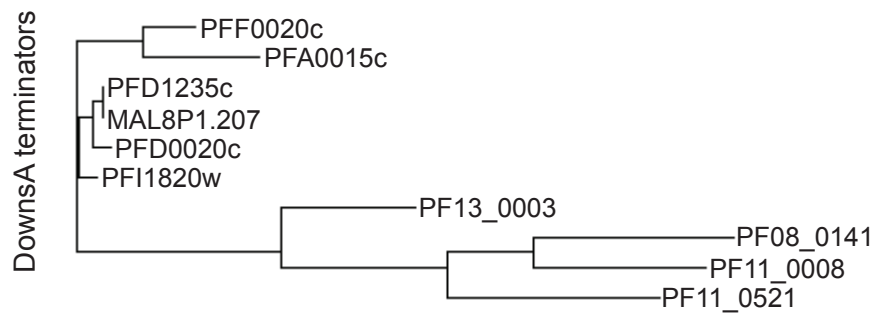

# Supplementary Figure 3

**A**

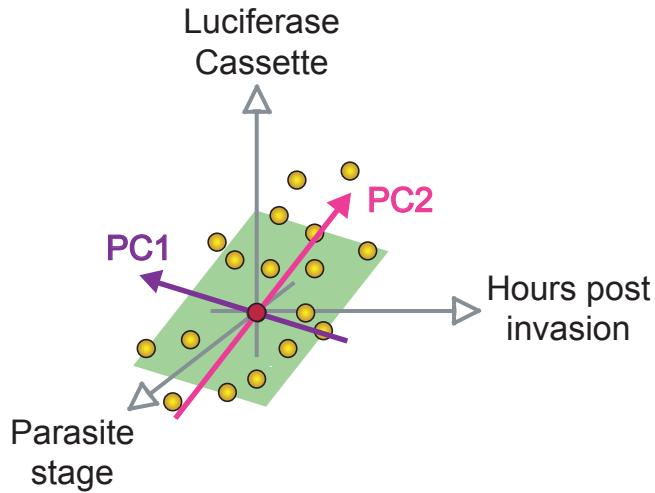

**B**

Lifecycle Variation

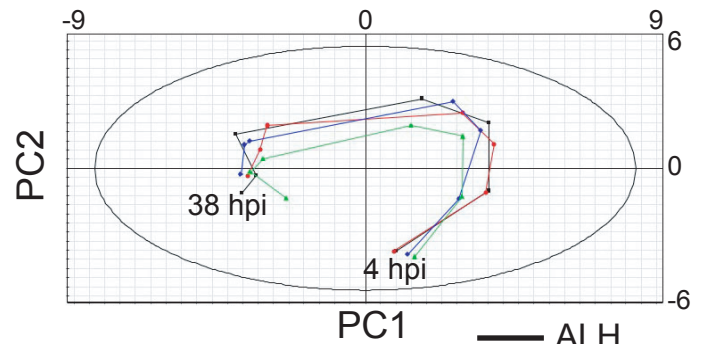

Reporter Cassette Variation

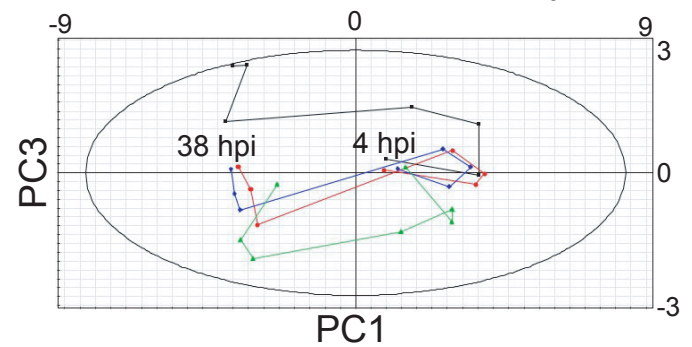

**C**

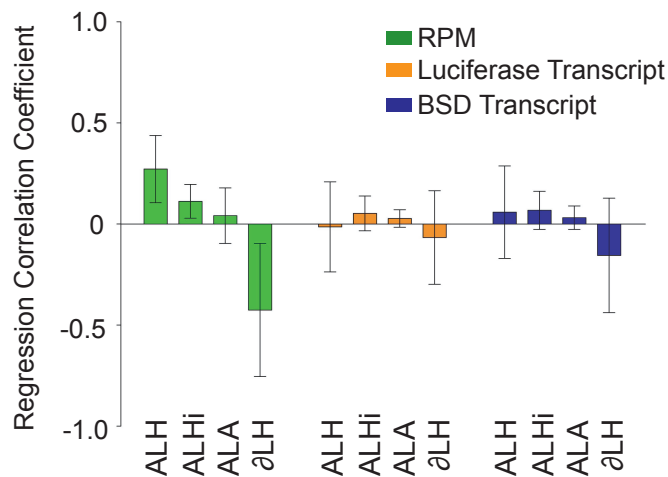

**D**

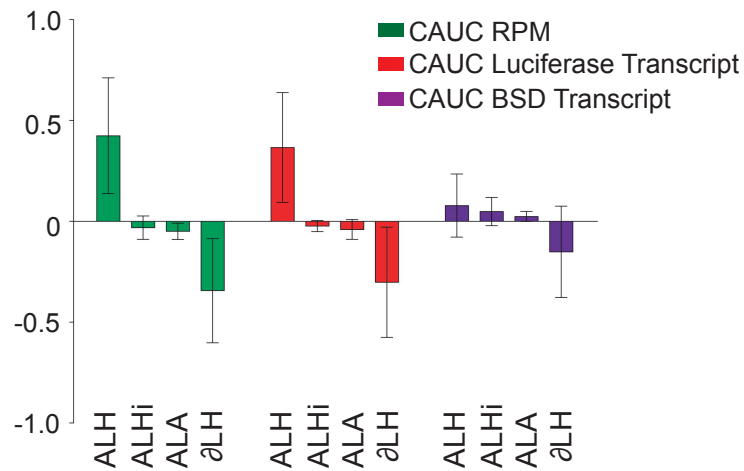

## Supplementary Figure 4

**A**

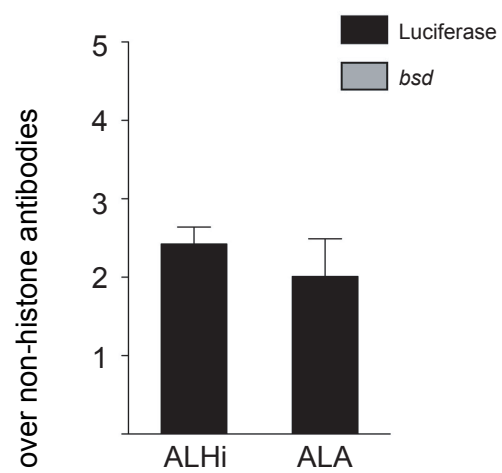

**B**

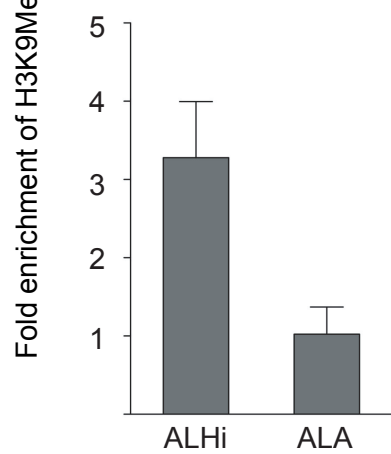

Supplement: NIHMS119687-supplement-04.pdf [file NIHMS119687-supplement-04.pdf]
